# Supplementary material for: A model reduction method for biochemical reaction networks
Source: PubMed Central journal article supplement (PMC4041147; doi:10.1186/1752-0509-8-52), 2014-05-03
Supplement: 1752-0509-8-52-S6.pdf [file 1752-0509-8-52-S6.pdf]

## A Matlab function for computing the final steady state with given initial conditions

```
function [xf, S, cnt] = LMFsolve(varargin)
% LMF SOLVE Solve a Set of Nonlinear Equations in Least-Squares Sense.
%%%%%%%%%%%%%%%%%%%%%%%%%%%%%%%%%%%%%%%%%%%%%%%%%%%%%%%%%%%%%%%%%%%%%%%%
% A solution is obtained by a shortened Fletcher version of the
% Levenberg-Maquardt algorithm for minimization of a sum of squares
% of equation residuals.
%
% [Xf, Ssq, CNT] = LMFsolve(FUN,Xo,Options)
% FUN      is a function handle or a function M-file name that evaluates
%          m-vector of equation residuals,
% Xo       is n-vector of initial guesses of solution,
% Options  is an optional set of Name/Value pairs of control parameters
%          of the algorithm. It may be also preset by calling:
%          Options = LMFsolve('default'), or by a set of Name/Value pairs:
%          Options = LMFsolve('Name',Value, ... ), or updating the Options
%          set by calling
%          Options = LMFsolve(Options,'Name',Value, ...).
%
% Name      Values {default}      Description
% 'Display' integer              Display iteration information
%                               {0} no display
%                               k display initial and every k-th iteration;
% 'FunTol'  {1e-7}               norm(FUN(x),1) stopping tolerance;
% 'XTol'    {1e-7}               norm(x-xold,1) stopping tolerance;
% 'MaxIter' {100}                Maximum number of iterations;
% 'Scaled'  value                Scale control:
%                               D = eye(m)*value;
%                               vector D = diag(vector);
%                               {[]} D(k,k) = JJ(k,k) for JJ(k,k)>0, or
%                               = 1 otherwise,
%                               where JJ = J.'*J
% Not defined fields of the Options structure are filled by default values.
%
% Output Arguments:
% Xf        final solution approximation
% Ssq       sum of squares of residuals
% Cnt       >0 count of iterations
%          -MaxIter, did not converge in MaxIter iterations
%
% Example: Rosenbrock valey inside circle with unit diameter
% R = @(x) sqrt(x'*x)-.5; % A distance from the radius r=0.5
% ros= @(x) [ 10*(x(2)-x(1)^2); 1-x(1); (R(x)>0)*R(x)*1000];
% [x,ssq,cnt]=LMFsolve(ros,[-1.2,1],'Display',1,'MaxIter',50)
% returns x = [0.4556; 0.2059], ssq = 0.2966, cnt = 18.
%
% Note: Users with old MATLAB versions (<7), which have no anonymous
% functions implemented, should call LMFsolve with named function for
% residuals. For above example it is
% [x,ssq,cnt]=LMFsolve('rosen',[-1.2,1]);
% where the function rosen.m is of the form
```

```

% function r = rosen(x)
%% Rosenbrock valey with a constraint
% R = sqrt(x(1)^2+x(2)^2)-.5;
%% Residuals:
% r = [ 10*(x(2)-x(1)^2) % first part
%       1-x(1)           % second part
%       (R>0)*R*1000.    % penalty
%       ];

% Reference:
% Fletcher, R., (1971): A Modified Marquardt Subroutine for Nonlinear Least
% Squares. Rpt. AERE-R 6799, Harwell

% Miroslav Balda,
% balda AT cdm DOT cas DOT cz
% 2007-07-02    v 1.0
% 2008-12-22    v 1.1 * Changed name of the function in LMFsolve
%                  * Removed part with wrong code for use of analytical
%                  * form for assembling of Jacobian matrix
% 2009-01-08    v 1.2 * Changed subfunction printit.m for better one, and
%                  * modified its calling from inside LMFsolve.
%                  * Repaired a bug, which caused an inclination to
%                  * instability, in charge of slower convergence.
%%%%%%%%%%%%%%%%%%%%%%%%%%%%%%%%%%%%%%%%%%%%%%%%%%%%%%%%%%%%%%%%%%%%%%%%

% OPTIONS
% %%%%%%%%%

% Default Options
if nargin==1 && strcmpi('default',varargin(1))
    xf.Display = 0;           % no print of iterations
    xf.MaxIter = 100;        % maximum number of iterations allowed
    xf.ScaledD = [];         % automatic scaling by D = diag(diag(J'*J))
    xf.FunTol = 1e-7;        % tolerace for final function value
    xf.XTol = 1e-4;         % tolerance on difference of x-solutions
    return

% Updating Options
elseif isstruct(varargin{1}) % Options=LMFsolve(Options,'Name','Value',...)
    if ~isfield(varargin{1},'Display')
        error('Options Structure not correct for LMFsolve.')
    end
    xf=varargin{1};         % Options
    for i=2:2:nargin-1
        name=varargin{i};   % Option to be updated
        if ~ischar(name)
            error('Parameter Names Must be Strings.')
        end
        name=lower(name(isletter(name)));
        value=varargin{i+1}; % value of the option
        if strcmp(name,'d',1), xf.Display = value;
        elseif strcmp(name,'f',1), xf.FunTol = value(1);
        elseif strcmp(name,'x',1), xf.XTol = value(1);
        elseif strcmp(name,'m',1), xf.MaxIter = value(1);
        elseif strcmp(name,'s',1), xf.ScaledD = value;
        else disp(['Unknown Parameter Name --> ' name])
        end
    end
end

```

```

end
return

%               Pairs of Options
elseif ischar(varargin{1}) % check for Options=LMFSOLVE('Name',Value,...)
    Pnames=char('display','funtol','xtol','maxiter','scaled');
    if strncmpi(varargin{1},Pnames,length(varargin{1}))
        xf=LMFsolve('default'); % get default values
        xf=LMFsolve(xf,varargin{:});
    end
end

% LMFSOLVE(FUN,Xo,Options)
%%%%%%%%%%%%%%%%%%%%%%%%%%%%%%%%%%%%%%%%%%%%%%%%%%%%%%%%%%%%%%%%%%%%%%%%

FUN=varargin{1}; % function handle
if ~(isvarname(FUN) || isa(FUN,'function_handle'))
    error('FUN Must be a Function Handle or M-file Name.')
end

xc=varargin{2}; % Xo

if nargin>2 % OPTIONS
    if isstruct(varargin{3})
        options=varargin{3};
    else
        if ~exist('options','var')
            options = LMFsolve('default');
        end
        for i=3:2:size(varargin,2)-1
            options=LMFsolve(options, varargin{i},varargin{i+1});
        end
    end
else
    if ~exist('options','var')
        options = LMFsolve('default');
    end
end

x = xc(:);
lx = length(x);

r = feval(FUN,x); % Residuals at starting point
%~~~~~
S = r'*r;
epsx = options.XTol(:);
epsf = options.FunTol(:);
if length(epsx)<lx, epsx=epsx*ones(lx,1); end
J = finjac(FUN,r,x,epsx);
%~~~~~
nfJ = 2;
A = J.'*J; % System matrix
v = J.'*r;

```

```

D = options.ScaleD;
if isempty(D)
    D = diag(diag(A));           % automatic scaling
    for i = 1:lx
        if D(i,i)==0, D(i,i)=1; end
    end
else
    if numel(D)>1
        D = diag(sqrt(abs(D(1:lx)))); % vector of individual scaling
    else
        D = sqrt(abs(D))*eye(lx);    % scalar of unique scaling
    end
end

Rlo = 0.25;
Rhi = 0.75;
l=1;    lc=.75;    is=0;
cnt = 0;
ipr = options.Display;
printit(ipr,-1);           % Table header
d = options.XTol;         % vector for the first cycle
maxit = options.MaxIter;  % maximum permitted number of iterations

while cnt<maxit && ...     % MAIN ITERATION CYCLE
    any(abs(d) >= epsx) && ... %%%%%%%%%%%
    any(abs(r) >= epsf)
    d = (A+l*D)\v;         % negative solution increment
    xd = x-d;
    rd = feval(FUN,xd);
% ~~~~~~
    nfJ = nfJ+1;
    Sd = rd.*rd;
    dS = d.*(2*v-A*d);     % predicted reduction

    R = (S-Sd)/dS;
    if R>Rhi                % halve lambda if R too high
        l = l/2;
        if l<lc, l=0; end
    elseif R<Rlo           % find new nu if R too low
        nu = (Sd-S)/(d.*v)+2;
        if nu<2
            nu = 2;
        elseif nu>10
            nu = 10;
        end
        if l==0
            lc = 1/max(abs(diag(inv(A))));
            l = lc;
            nu = nu/2;
        end
        l = nu*l;
    end

    cnt = cnt+1;
    if ipr~=0 && (rem(cnt,ipr)==0 || cnt==1) % print iteration?
        printit(ipr,cnt,nfJ,S,x,d,l,lc)
    end
end

```

```

end

if Sd<S
    S = Sd;
    x = xd;
    r = rd;
    J = finjac(FUN,r,x,epsx);
%
    nfJ = nfJ+1;
    A = J'*J;
    v = J'*r;
end
end % while

xf = x; % final solution
if cnt==maxit
    cnt = -cnt;
end % maxit reached
rd = feval(FUN,xf);
nfJ = nfJ+1;
Sd = rd.'*rd;
if ipr, disp(' '), end
printit(ipr,cnt,nfJ,Sd,xf,d,1,lc)

%%%%%%%%%%%%%%%%%%%%%%%%%%%%%%%%%%%%%%%%%%%%%%%%%%%%%%%%%%%%%%%%%%%%%%%%
% FINJAC numerical approximation to Jacobi matrix
% %%%%%%%%%
function J = finjac(FUN,r,x,epsx)
%~~~~~
lx=length(x);
J=zeros(length(r),lx);
for k=1:lx
    dx=.25*epsx(k);
    xd=x;
    xd(k)=xd(k)+dx;
    rd=feval(FUN,xd);
%
    J(:,k)=(rd-r)/dx;
end
%%%%%%%%%%%%%%%%%%%%%%%%%%%%%%%%%%%%%%%%%%%%%%%%%%%%%%%%%%%%%%%%%%%%%%%%

function printit(ipr,cnt,res,SS,x,dx,1,lc)
%
% ~~~~~ Printing of intermediate results
% ipr < 0 do not print lambda columns
% = 0 do not print at all
% > 0 print every (ipr)th iteration
% cnt = -1 print out the header
% 0 print out second row of results
% >0 print out first row of results
if ipr~=0
    if cnt<0 % table header
        disp('')
        disp(char('*'*ones(1,75)))
        fprintf(' itr nfJ SUM(r^2) x dx');
        if ipr>0
            fprintf(' 1 lc');
        end
    end
end

```

```

end
fprintf('\n');
disp(char('*'*ones(1,75)))
disp('')
else % iteration output
if rem(cnt,ipr)==0
f='%12.4e ';
if ipr>0
fprintf(['%4.0f %4.0f ' f f f f f '\n'],...
cnt,res,SS, x(1),dx(1),l,lc);
else
fprintf(['%4.0f %4.0f ' f f f '\n'],...
cnt,res,SS, x(1),dx(1));
end
for k=2:length(x)
fprintf([blanks(23) f f '\n'],x(k),dx(k));
end
end
end
end
end
end

```
